# Supplementary material for: Dual polymeric prodrug co-assembled nanoparticles with precise ratiometric co-delivery of cisplatin and metformin for lung cancer chemoimmunotherapy
Source: Royal Society of Chemistry journal article supplement (doi:10.1039/d0bm01191f), 2020-01-01
Supplement: d0bm01191f1.pdf [file d0bm01191f1.pdf]

**Title:**

**Dual polymeric prodrug co-assembled nanoparticles with precise  
ratiometric co-delivery of cisplatin and metformin for lung cancer  
chemoimmunotherapy**

**Author:**

Tong Yang ‡<sup>a</sup>, Shuangyu Yu ‡<sup>a</sup>, Lu Liu ‡<sup>a</sup>, Yue Sun<sup>a</sup>, Yang Lan<sup>a</sup>, Xueqin Ma<sup>a, b</sup>,  
Rongyue Zhu<sup>a, b</sup>, Li Li<sup>a, b</sup>, Yanhui Hou<sup>a, b</sup>, Yanhua Liu<sup>\* a, b</sup>

**Affiliation:**

<sup>a</sup> Department of Pharmaceutics, School of Pharmacy, Ningxia Medical University, No.  
1160, Shengli Street, Yinchuan, 750004, China

<sup>b</sup> Key Laboratory of Hui Ethnic Medicine Modernization, Ministry of Education,  
Ningxia Medical University, Yinchuan, 750004, China

**Author Contributions:**

‡ These authors contributed equally to this work.

**\* Corresponding Author:**

Prof. Yanhua Liu, Ph D, Department of Pharmaceutics, School of Pharmacy, Ningxia  
Medical University, No. 1160, Shengli Street, Yinchuan, 750004, China. Tel/Fax:  
+86-951-6880693; E-mail: [lyanhua1214@126.com](mailto:lyanhua1214@126.com)

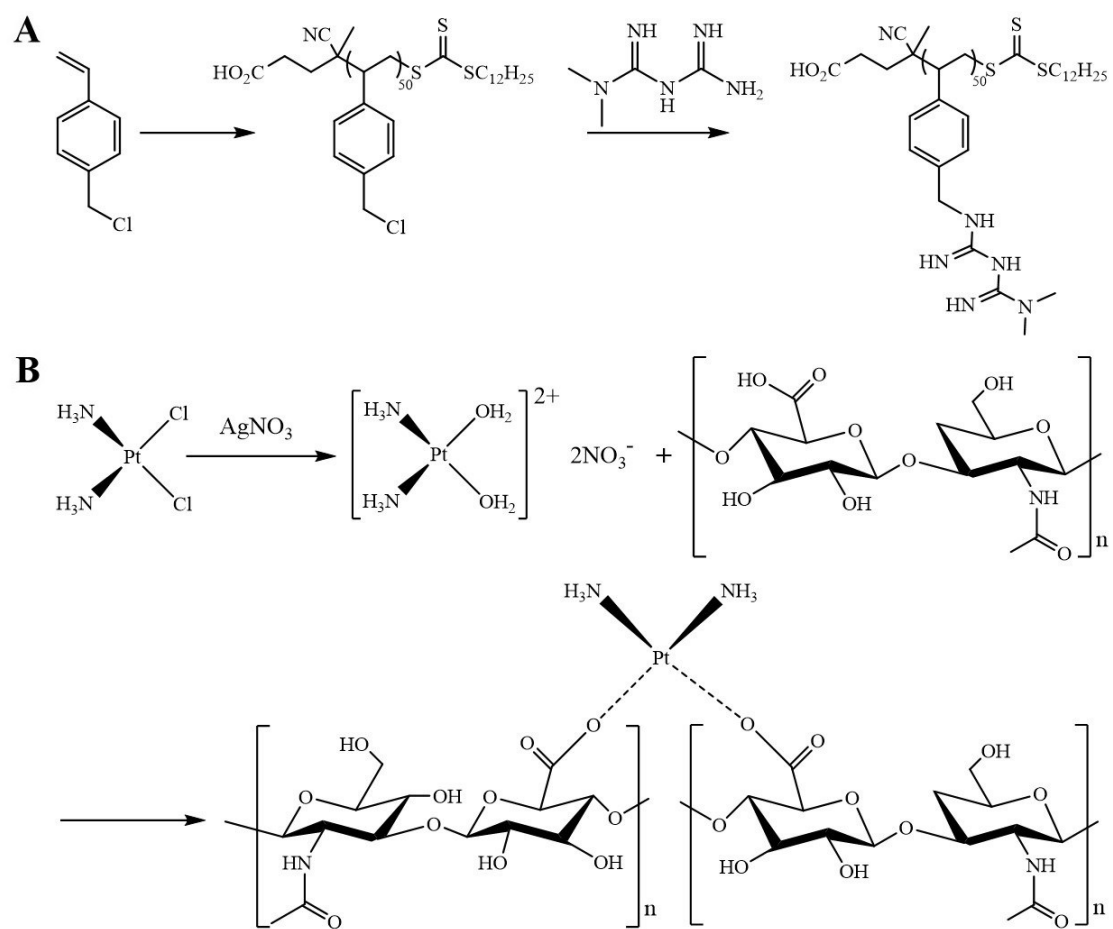

**Scheme S1.** Synthesis of PMet (A) and HA-CDDP (B) polymeric prodrugs.

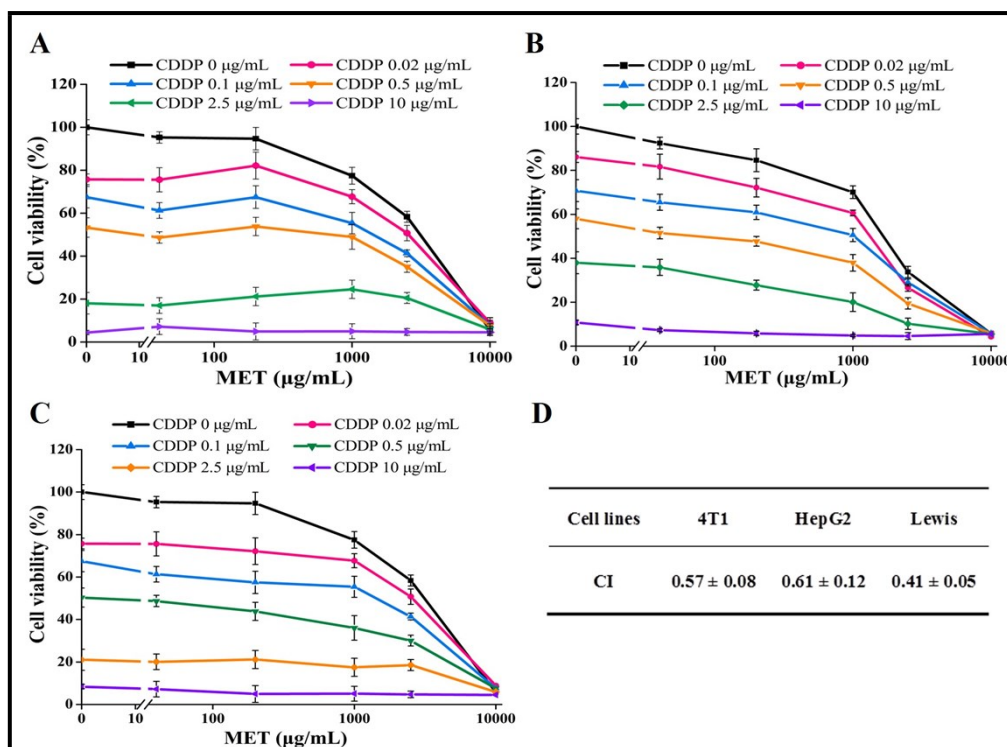

**Figure S1.** The cytotoxicity profiles of MET and CDDP combination treatment against 4T1 (A), HepG2 (B) and LLC (C) cell lines for 72 h. (D) Synergy of MET with CDDP was indicated by CI values.

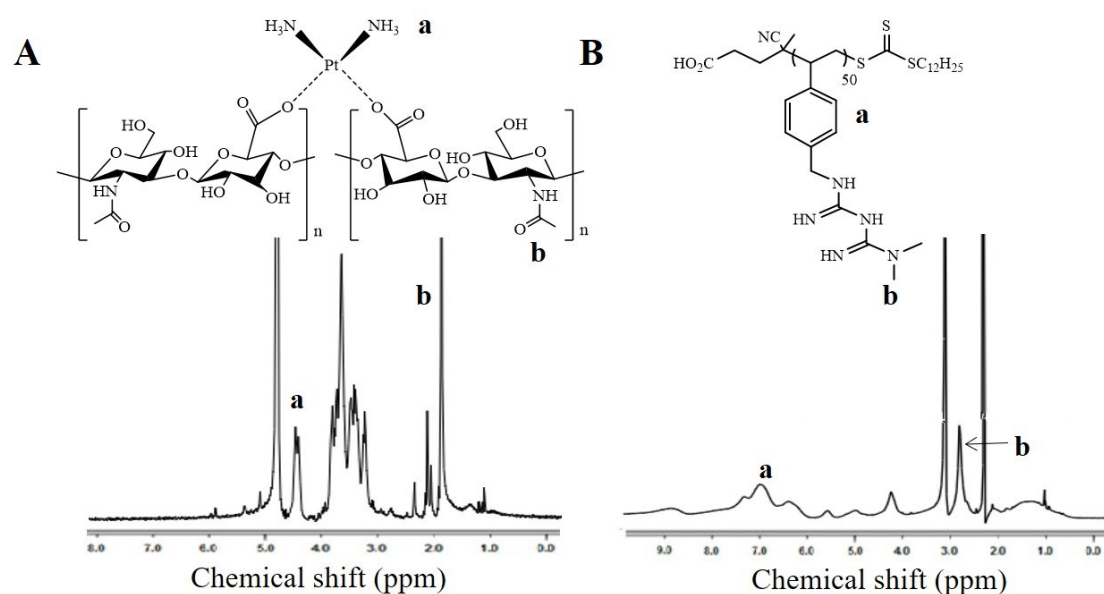

**Figure S2.**  $^1\text{H}$  NMR spectra of HA-CDDP (A) in  $\text{D}_2\text{O}$  and PMet (B) in  $\text{DMSO-d}_6$ .

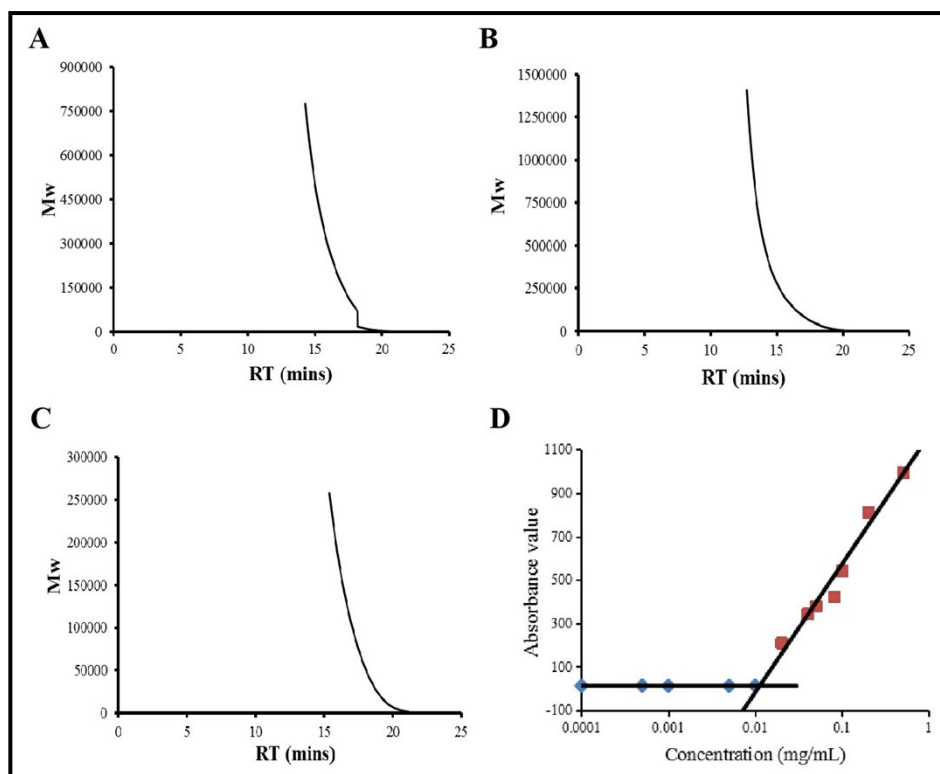

**Figure S3.** GPC assay of PVBC polymer (A), PMet prodrug (B) and HA-CDDP prodrug (C). Plots of fluorescence intensity of Nile red against PMet polymeric prodrug concentration (D).

**Table S1** GPC parameters of polymers

| Polymer                      | Mn     | Mw     | Mw/Mn | PDI   |
|------------------------------|--------|--------|-------|-------|
| poly(4-vinylbenzyl chloride) | 67690  | 150205 | 2.219 | 1.292 |
| PMet                         | 121403 | 287772 | 2.37  | 1.447 |
| HA-CDDP                      | 32356  | 70154  | 2.168 | 1.845 |

**Table S2** IC<sub>50</sub> values of CDDP solution, MET solution, Free combo, HA-CDDP solution, HA/PMet NPs and HA-CDDP/PMet NPs against 4T1 cells, HepG2 cells and LLC cells after 72 h treatment (mean  $\pm$  SD, n = 3).

| Formulations     | IC <sub>50</sub> ( $\mu$ g/mL) |                   |                   |
|------------------|--------------------------------|-------------------|-------------------|
|                  | 4T1                            | HepG2             | LLC               |
| CDDP solution    | 3.04 $\pm$ 0.31                | 1.05 $\pm$ 0.09   | 2.11 $\pm$ 0.36   |
| MET solution     | 249.19 $\pm$ 7.05              | 185.47 $\pm$ 4.08 | 213.87 $\pm$ 5.04 |
| Free combo       | 1.77 $\pm$ 0.02                | 11.33 $\pm$ 2.01  | 1.03 $\pm$ 0.07   |
| HA-CDDP solution | 1.99 $\pm$ 0.14                | 1.76 $\pm$ 0.13   | 1.83 $\pm$ 0.27   |
| HA/PMet NPs      | 3.58 $\pm$ 0.35                | 3.34 $\pm$ 0.21   | 3.58 $\pm$ 0.39   |
| HA-CDDP/PMet NPs | 1.07 $\pm$ 0.07                | 0.50 $\pm$ 0.05   | 0.74 $\pm$ 0.05   |



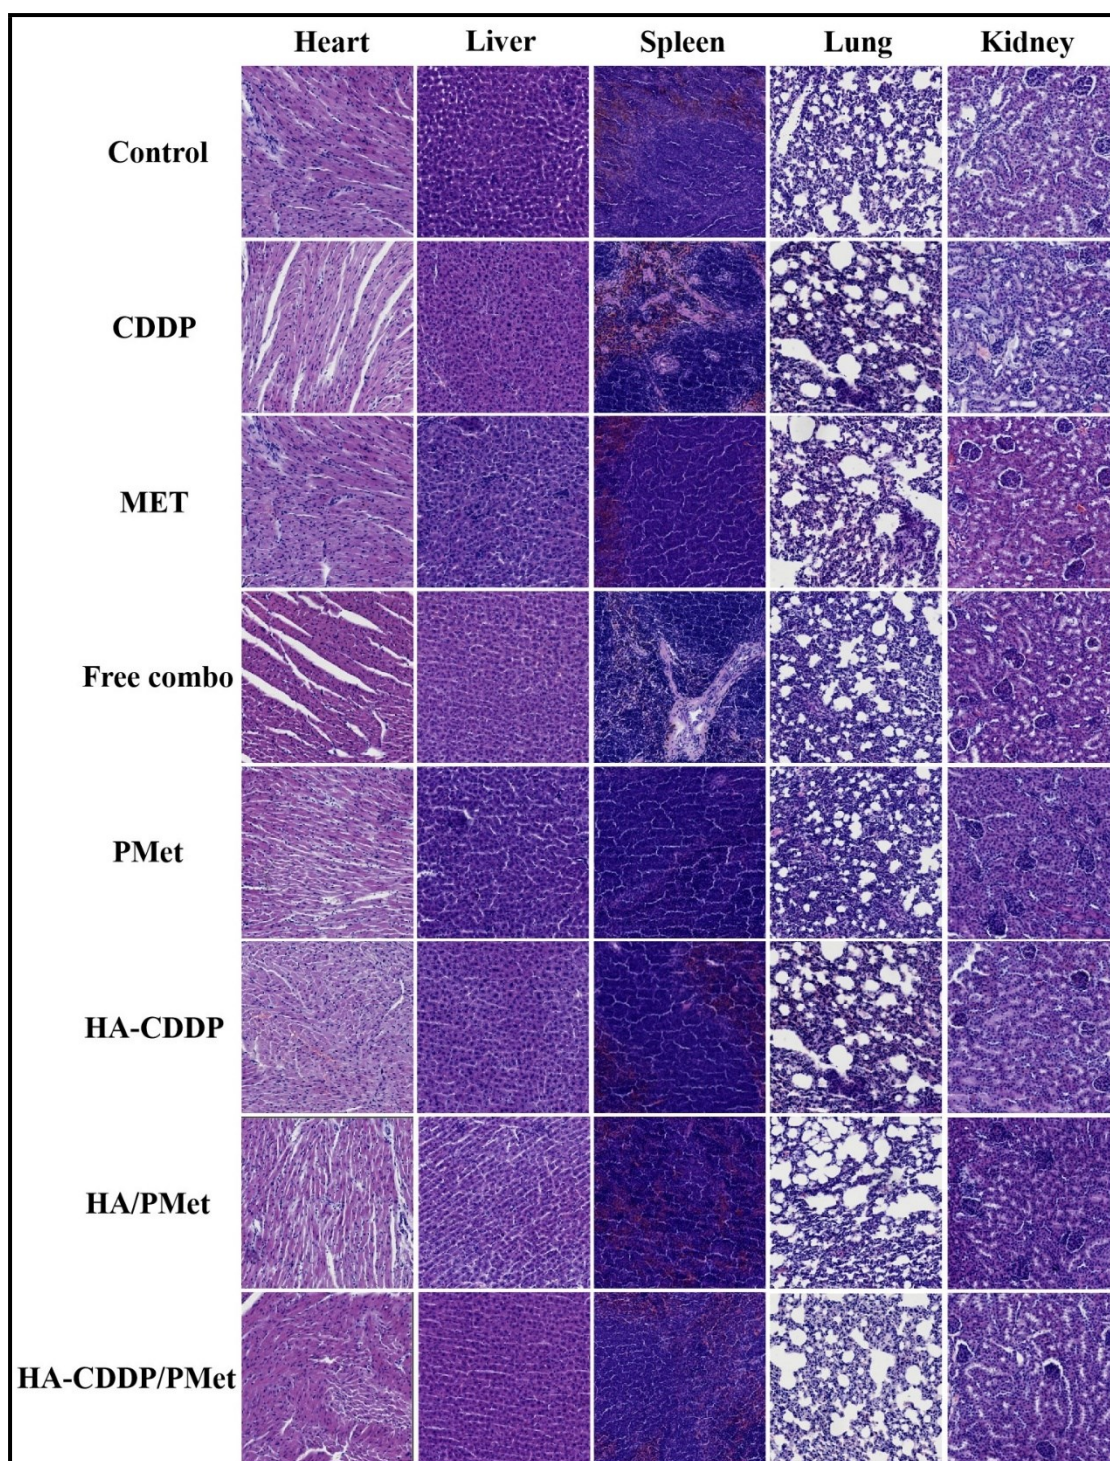

**Figure S4.** H&E staining of heart, liver, spleen, lung and kidney after various treatments, scale bar = 50  $\mu$ m.
